# Supplementary material
Source: HighWire-hosted journal article supplement (https://jnm.snmjournals.org/highwire/filestream/99566/field_highwire_adjunct_files/0/246785_Supplemental_Data.pdf)
Supplement: 246785_Supplemental_Data.pdf [file 246785_Supplemental_Data.pdf]

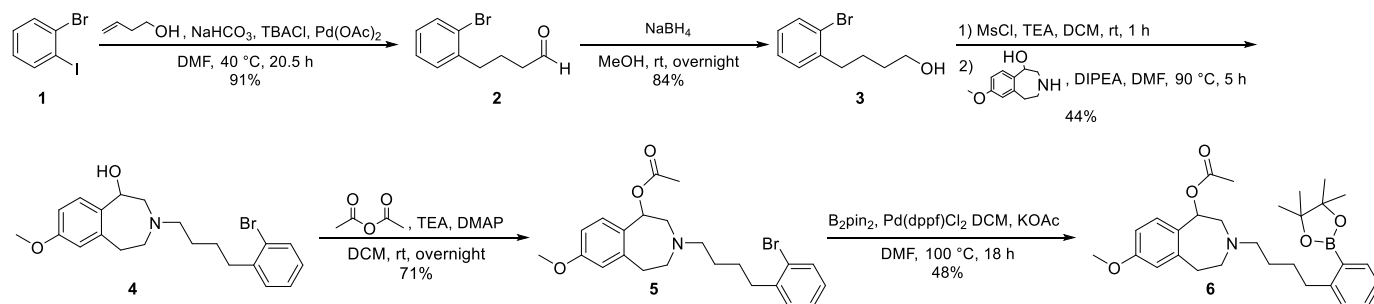

Supplemental Figure 1. Synthesis of boronic ester precursor **6** for synthesis of  $^{18}\text{F}$ -OF-NB1.

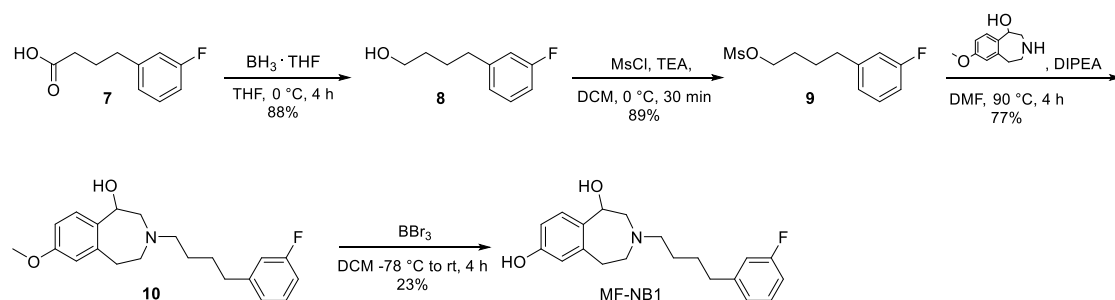

Supplemental Figure 2. Synthesis of MF-NB1.

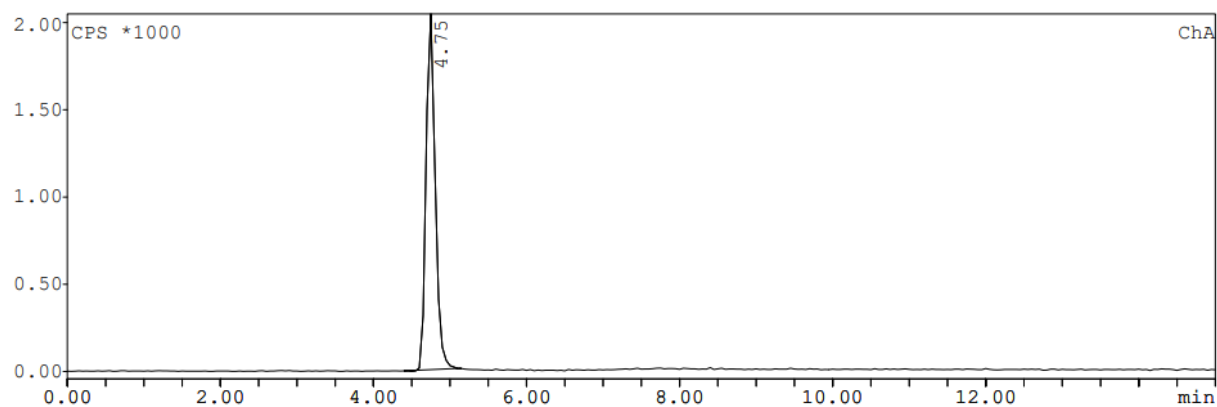

Supplemental Figure 3. Quality control of  $^{18}\text{F}$ -OF-NB1 after formulation. In brief,  $^{18}\text{F}$ -fluoride ions were produced by the bombardment of 98% enriched  $^{18}\text{O}$ -water by means of the  $^{18}\text{O}(\text{p},\text{n})^{18}\text{F}$  nuclear reaction in a Cyclone 18/9 cyclotron

(18-MeV; IBA) resulting in a starting activity of nearly 60 GBq in 0.94 mL of  $^{18}\text{O}$ -enriched  $\text{H}_2\text{O}$ .  $^{18}\text{F}$ fluoride ions were captured on an anion-exchange cartridge (Waters SepPak Accell QMA cartridge, light carbonate, preconditioned) and were then eluted with a mixture of Kryptofix 222 (6.3 mg/mL, 16.7  $\mu\text{mol/mL}$ ; Merck),  $\text{K}_2\text{C}_2\text{O}_4$  (1.0 mg/mL, 5.4  $\mu\text{mol/mL}$ ), and  $\text{K}_2\text{CO}_3$  (0.1 mg/mL, 0.7  $\mu\text{mol/mL}$ ) dissolved in a solution of MeCN/ $\text{H}_2\text{O}$  (4:1, 6 x 0.15 mL), followed by azeotropic drying with acetonitrile (3 x 0.8 mL) in a borosilicate glass Reacti-Vial (Wheaton Industries, 6 mL) sealed with a screw plastic cap in which a Teflon (DuPont)-faced rubber septum was fitted. The Reacti-Vial was subsequently left to cool down for 2 min and purged with air (20 mL), after which the residue was redissolved in a solution of 6–8 mg (18–24  $\mu\text{mol}$ ) of boronic ester **6** and 14 mg (21  $\mu\text{mol}$ ) of  $\text{Cu}(\text{OTf})_2(\text{py})_4$  in 0.3 mL of dry dimethylacetamide. The mixture was stirred at 120  $^\circ\text{C}$  for 20 min before it was diluted with 35 mL of  $\text{H}_2\text{O}$  and the subsequent trapping of the intermediate on a C18 Plus cartridge (Waters, pre-conditioned with 5 mL MeCN and 5 mL  $\text{H}_2\text{O}$ ). The cartridge was washed with water (5 mL) followed by the elution of radiolabeled protected intermediate **11** with 2 mL of EtOH which was evaporated at 95  $^\circ\text{C}$  for 6 min and subsequently azeotropically dried with MeCN (2 x 0.8 mL). The Reacti-Vial was cooled down in an ice bath before 0.5 mL of dichloromethane were added, followed by 1 mL of  $\text{BBr}_3$  (1 M in DCM) and stirring at room temperature for 15 min. The dichloromethane was evaporated and the reaction was then quenched by the addition of aq. 0.1%  $\text{H}_3\text{PO}_4/\text{MeCN}$  (5:1, 3 mL). Afterwards, the products were purified by semi-preparative HPLC on a Merck-Hitachi L2130 HPLC system mounted with a radiation detector VRM 202 (Comcer, Netherlands). The purification was performed using an Agilent Eclipse XDB-C18 reversed phase column (5  $\mu\text{m}$ , 9.4 x 250 mm) and a gradient system comprising MeCN (solvent B) and aq.  $\text{H}_3\text{PO}_4$  (0.1%, solvent C) with a flow rate of 4 mL/min and UV detection wavelength  $\lambda$  of 230 nm: 0.0–5.0 min, 20% B; 5.1–25.0 min, 20–40% B; 25.1–28.0 min, 40% B; 28.1–30.0 min, 40–60% B; 30.1–33.0 min, 60–90% B; 33.1–36.0 min, 90% B; 36.1–38.0 min, 90–20% B; 38.1–42.0 min, 20% B. The collected fraction was diluted with 35 mL of  $\text{H}_2\text{O}$  and the product was trapped on a C18 Light cartridge (Waters, pre-conditioned with 2 mL EtOH and 2 mL water). The cartridge was washed with 2 mL of water followed by elution of the radiotracer with 1 mL of EtOH. The product was formulated with 5% EtOH in water for injection to afford  $^{18}\text{F}$ -OF-NB1. The identity of the radiotracer was confirmed by co-injection with its corresponding non-radioactive reference compound whereby an aliquot taken from the final formulation was injected into an Agilent 1100 HPLC system equipped with a Raytest Gabi Star radiodetector as well as an analytical Atlantis T3 C18 reversed-phase column (3  $\mu\text{m}$ , 4.6 x 150 mm). A flow rate of 1 mL/min and detection wavelength  $\lambda$  of 230

were in use with a gradient system comprising 0.1% TFA in H<sub>2</sub>O (solvent A), MeCN (solvent B); 0.0-10.0 min, 40-60% B; 10.01-11.00 min, 60-40% B; 11.01-15.0 min, 40% B.

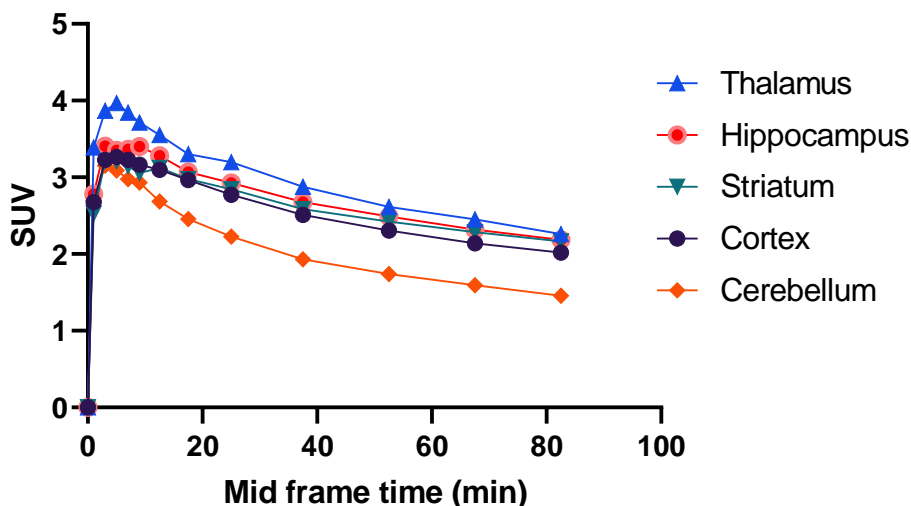

Supplemental Figure 4. Representative regional distribution of <sup>18</sup>F-OF-NB1 across the brain of a Wistar rat. The following equations were used simultaneously to determine the receptor occupancy from SUV<sub>0-90 min</sub>: 1)  $AUC = (b_{max} - b_{min}) * D_{50} / (D + D_{50}) + b_{min}$ . 2)  $RO = (b_{max} - AUC) / (b_{max} - b_{min}) * 100$ , where AUC is defined as the area under the curve of the whole respective PET scan, D is the administered dose while RO is the receptor occupancy in %.  $b_{max}$  and  $b_{min}$  are the maximum and minimum binding values, respectively. For the autoradiography, adult rat brain tissues embedded in optimal cutting temperature medium were developed as 10  $\mu$ m thick coronal sections on a cryostat (Cryo-Star HM 560 MV; Microm, Thermo Scientific, Wilmington, DE, USA). Slices were adsorbed on SuperFrost Plus glass slides (Menzel, Braunschweig, Germany) and subsequently preserved at -20 °C. The slices were thawed for 15 min on ice and subsequently preconditioned in an aqueous incubation buffer consisting of 30 mM HEPES, 0.56 mM MgCl<sub>2</sub>, 110 mM NaCl, 5 mM KCl, 3.3 mM CaCl<sub>2</sub> and 0.1 % fatty acid free bovine serum albumin (pH 7.4, 0 °C) for 10 min. The slides were allowed to dry for 2-3 min at room temperature and then incubated with 3 nM of <sup>18</sup>F-OF-NB1, either alone or premixed with GluN2B subunit or  $\sigma$ 1R blockers for 20 min at room temperature in a humidified chamber. The liquid was decanted and the slices were left for 5 min in the incubation buffer at 0 °C. The slices were washed (2 x 3 min) in a washing buffer (Same composition as the incubation buffer but without the fatty acid free

bovine serum albumin) and (2 x 5 sec) in distilled water at 0 °C. The slices were subsequently dried for 5 min at room temperature and then exposed to a phosphor imager plate (Fuji, Dielsdorf, Switzerland) for 35-40 minutes. The films were scanned by a BAS5000 reader (Fuji) and the data was analyzed using AIDA 4.50.010 software (Raytest Isotopenmessgeräte GmbH, Straubenhardt, Germany).

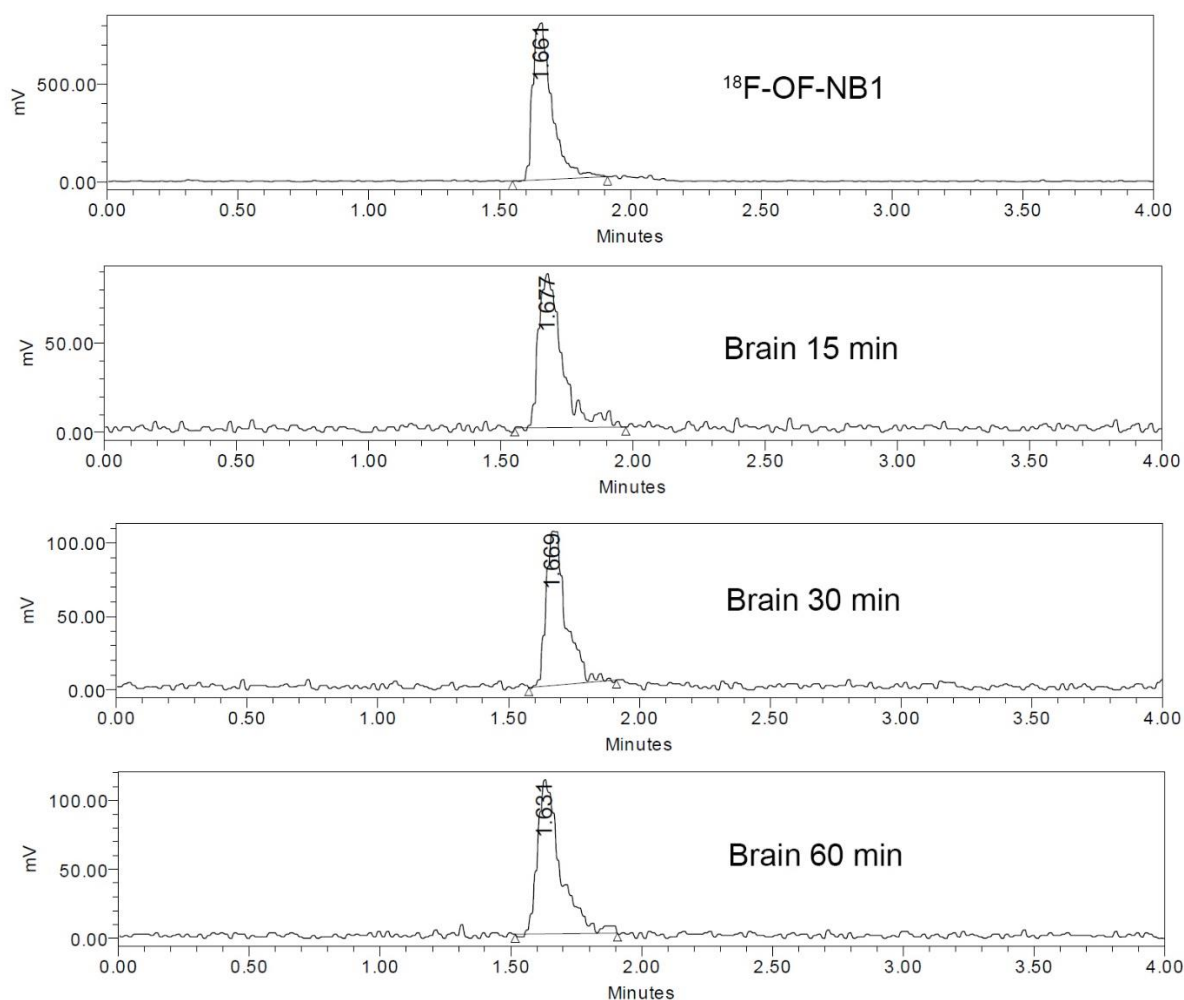

Supplemental Figure 5. *Ex vivo* metabolite study with  $^{18}\text{F}$ -OF-NB1 in male Wistar rats. Radio-UPLC analysis of brain homogenate samples after 15, 30 and 60 min post-injection showed the exclusive presence of the parent intact tracer. In brief, the brain extracts were dissolved in 2 mL phosphate buffered saline (PBS) followed by homogenization and subsequent addition of 2 mL acetonitrile. Afterwards, the mixture was vortexed, centrifuged at 5000g for 5 min (4 °C) and the resultant supernatant was filtered. The blood samples were collected in heparin-coated tubes followed by transfer of 0.1 mL of the sample to Eppendorf tubes containing acetonitrile. The Eppendorf tubes were vortexed and centrifuged at 5000g for 5 min at 4 °C resulting in plasma supernatant. The supernatant was

collected into new Eppendorf tubes containing acetonitrile and subsequently followed by a second centrifugation.

The resultant supernatant was filtered. The processed brain and blood samples were analyzed by radio-ultra-performance liquid chromatography (UPLC).

Supplemental Table 1. Brain biodistribution of  $^{18}\text{F}$ -OF-NB1 in Wistar rats (baseline injections n=4, eliprodil 2 mg/kg blockade n=4), reported as averaged % normalized injected dose per gram body weight  $\pm$  SD. For blockade

| Organ                        | 45 min post-injection | 45 min post-injection + 2 mg/kg eliprodil | Specificity % |
|------------------------------|-----------------------|-------------------------------------------|---------------|
| Bulbus olfactorius           | 0.24 $\pm$ 0.04       | 0.11 $\pm$ 0.007                          | 53            |
| Hippocampus                  | 0.24 $\pm$ 0.02       | 0.17 $\pm$ 0.012                          | 31            |
| Thalamus                     | 0.29 $\pm$ 0.04       | 0.17 $\pm$ 0.011                          | 42            |
| Cerebellum                   | 0.23 $\pm$ 0.02       | 0.11 $\pm$ 0.007                          | 52            |
| Brain stem                   | 0.28 $\pm$ 0.04       | 0.12 $\pm$ 0.009                          | 55            |
| Colliculus superior/inferior | 0.29 $\pm$ 0.03       | 0.12 $\pm$ 0.009                          | 57            |
| Cortex                       | 0.32 $\pm$ 0.04       | 0.16 $\pm$ 0.010                          | 52            |
| Striatum                     | 0.29 $\pm$ 0.03       | 0.15 $\pm$ 0.008                          | 48            |

experiments, 2 mg/kg of eliprodil constituted in a solution of aqueous glucose (5%), NaCl (0.45%) and citric acid (1 mM) was administered prior to tracer injection. Organs were extracted, weighed and radioactivity was measured in a gamma-counter (Perkin Elmer, Schwerzenbach, Switzerland). For statistical analysis, an independent two-tailed paired Student's test assuming normal distribution of the dataset was employed to determine statistical probability values.

Supplemental Table 2. *Ex vivo* whole body biodistribution of  $^{18}\text{F}$ -OF-NB1 in Wistar rats (baseline injections n=4, eliprodil 2 mg/kg blockade n=4), reported as averaged % normalized injected dose per gram body weight  $\pm$  SD.

| Organ         | 45 min post-injection | 45 min post-injection + 2 mg/kg eliprodil | Specificity %  |
|---------------|-----------------------|-------------------------------------------|----------------|
| Spleen        | 0.27 $\pm$ 0.02       | 0.22 $\pm$ 0.017                          | 19             |
| Liver         | 0.10 $\pm$ 0.02       | 0.13 $\pm$ 0.017                          | No specificity |
| Kidney        | 0.62 $\pm$ 0.05       | 0.25 $\pm$ 0.018                          | 59             |
| Adrenal gland | 1.4 $\pm$ 0.21        | 0.42 $\pm$ 0.054                          | 69             |
| Lungs         | 0.30 $\pm$ 0.04       | 0.22 $\pm$ 0.041                          | 28             |
| Bone          | 0.08 $\pm$ 0.01       | 0.07 $\pm$ 0.007                          | 13             |
| Heart         | 0.08 $\pm$ 0.01       | 0.06 $\pm$ 0.003                          | 27             |
| Fat           | 0.03 $\pm$ 0.005      | 0.04 $\pm$ 0.008                          | No specificity |
| Intestine     | 0.64 $\pm$ 0.08       | 0.77 $\pm$ 0.270                          | No specificity |
| Testicles     | 0.07 $\pm$ 0.01       | 0.07 $\pm$ 0.004                          | 0.05           |
| Blood         | 0.01 $\pm$ 0.001      | 0.01 $\pm$ 0.001                          | No specificity |
| Urine         | 0.55 $\pm$ 0.18       | 0.70 $\pm$ 0.082                          | No specificity |
| Muscle        | 0.08 $\pm$ 0.01       | 0.07 $\pm$ 0.006                          | 16             |
| Pancreas      | 0.72 $\pm$ 0.03       | 0.61 $\pm$ 0.035                          | 16             |
| Skin          | 0.04 $\pm$ 0.005      | 0.04 $\pm$ 0.003                          | 3              |
